# Supplementary material for: Service user involvement in the education of allied healthcare professionals in Ireland: A descriptive case study
Source: Research Square preprint supplement (doi:10.21203/rs.3.rs-7046821/v1), 2025-08-13
Supplement: Supplementary file 3 [file c08d6fb62d3fbadd42ef95d1.docx]

Appendix 1 Towle's Spectrum of Involvement (Towle et al., 2010).

| **Towle Level** | **Degree to which SU is actively involved in learning encounter** |
| --- | --- |
| 1 | Paper-based or electronic case or scenario. |
| 2 | Patient shared his or her experience with students within a faculty-directed curriculum. |
| 3 | Patient-teacher(s) are involved in teaching or evaluating students. |
| 4 | Patient-teacher(s) as equal partners in student education, evaluation and curriculum development. |
| 5 | As (5) above plus, patient(s) involved at the institutional level. |
